# Supplementary material for: Pan-cancer analysis of N4-acetylcytidine adaptor THUMPD1 as a predictor for prognosis and immunotherapy
Source: Oxford University Press journal article supplement (doi:10.1042/bsr20212300), 2021-11-11
Supplement: bsr-2021-2300_supp.pdf [file bsr-2021-2300_supp.pdf]

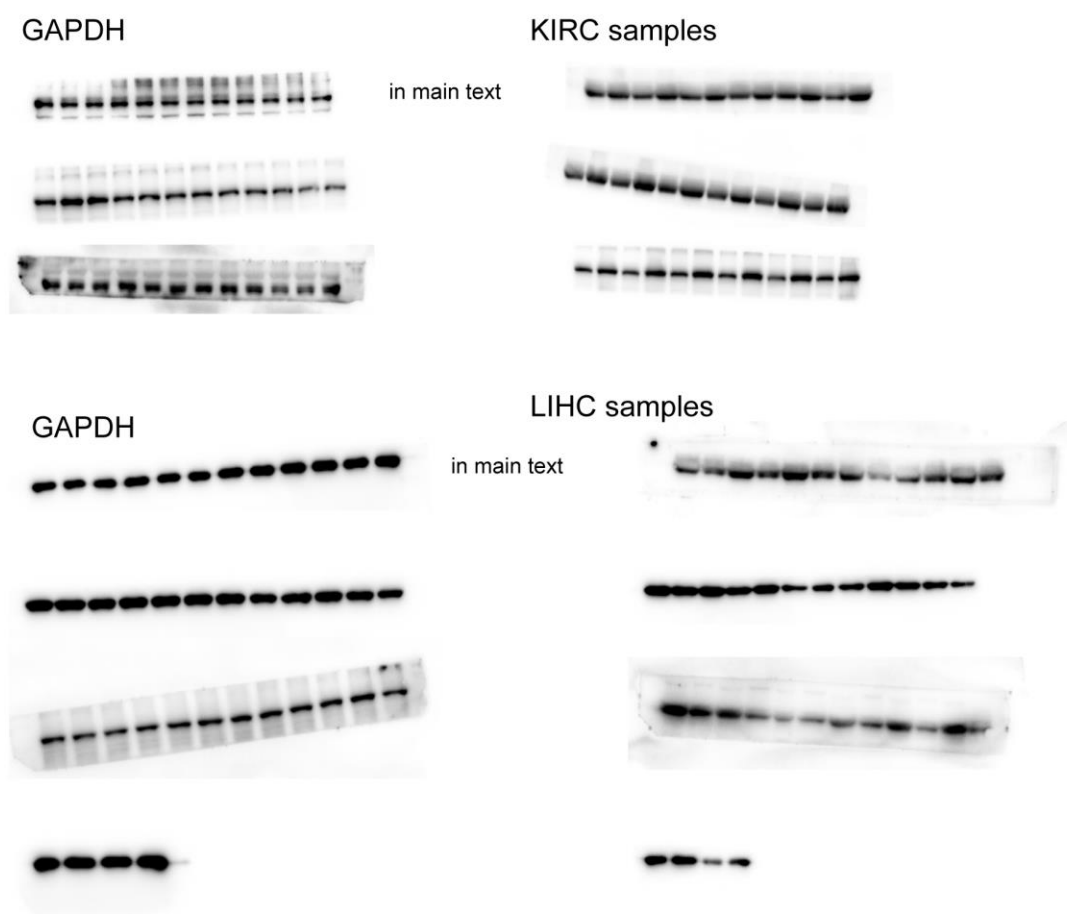

**Supplementary Figure 1.** Original bands of Western blots in KIRC and LIHC clinical samples.

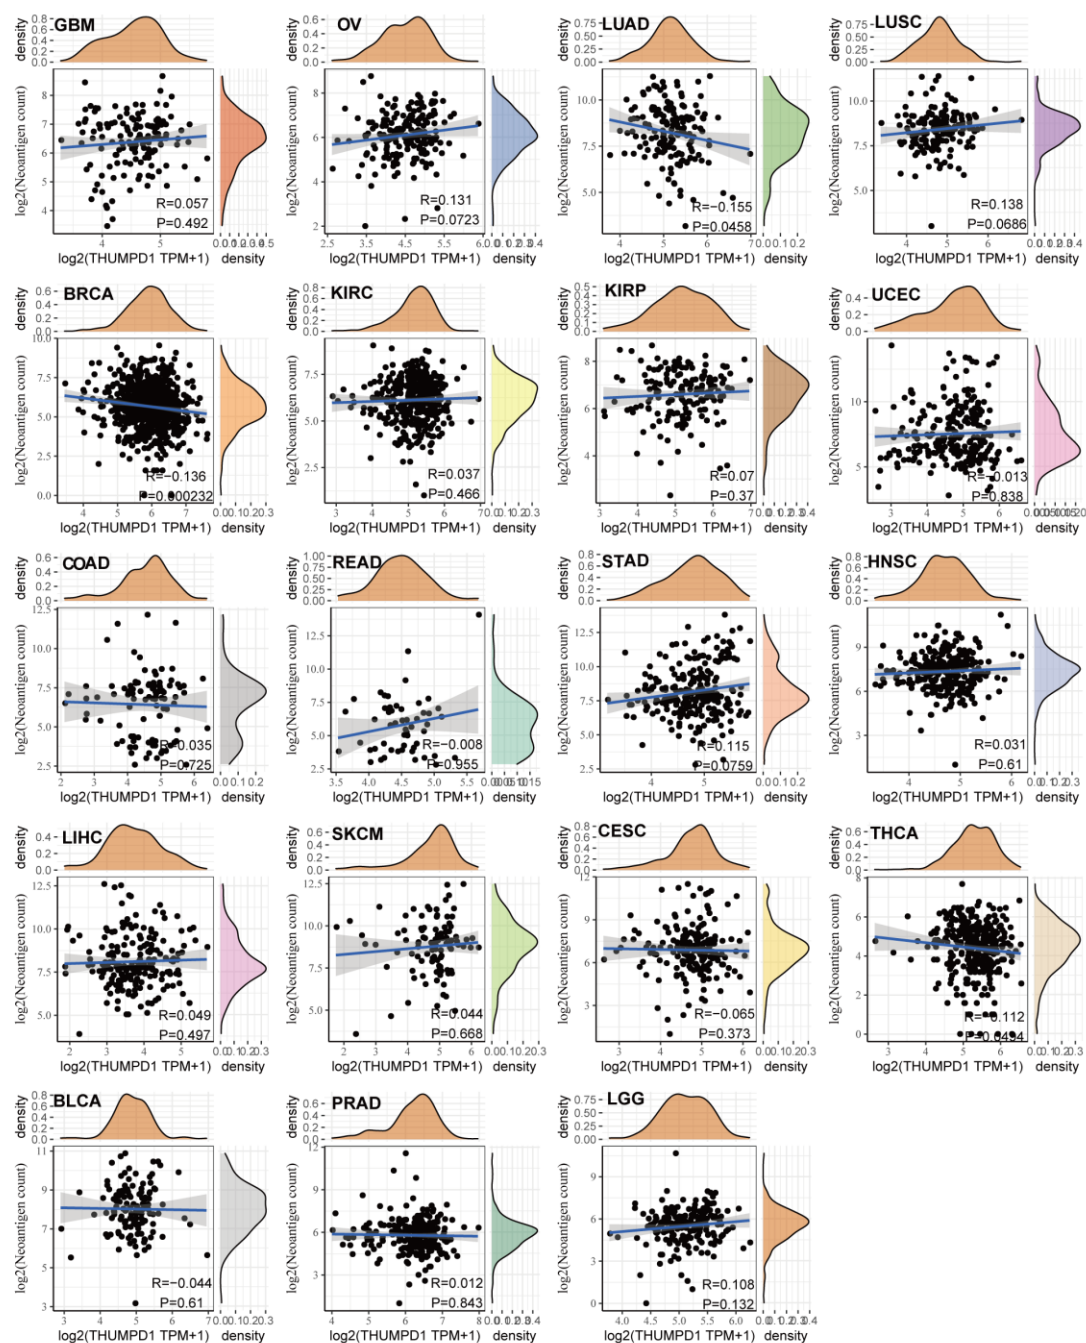

**Supplementary Figure 2.** Correlation between THUMPD1 expression and neoantigen in 33 cancer types from TCGA database.

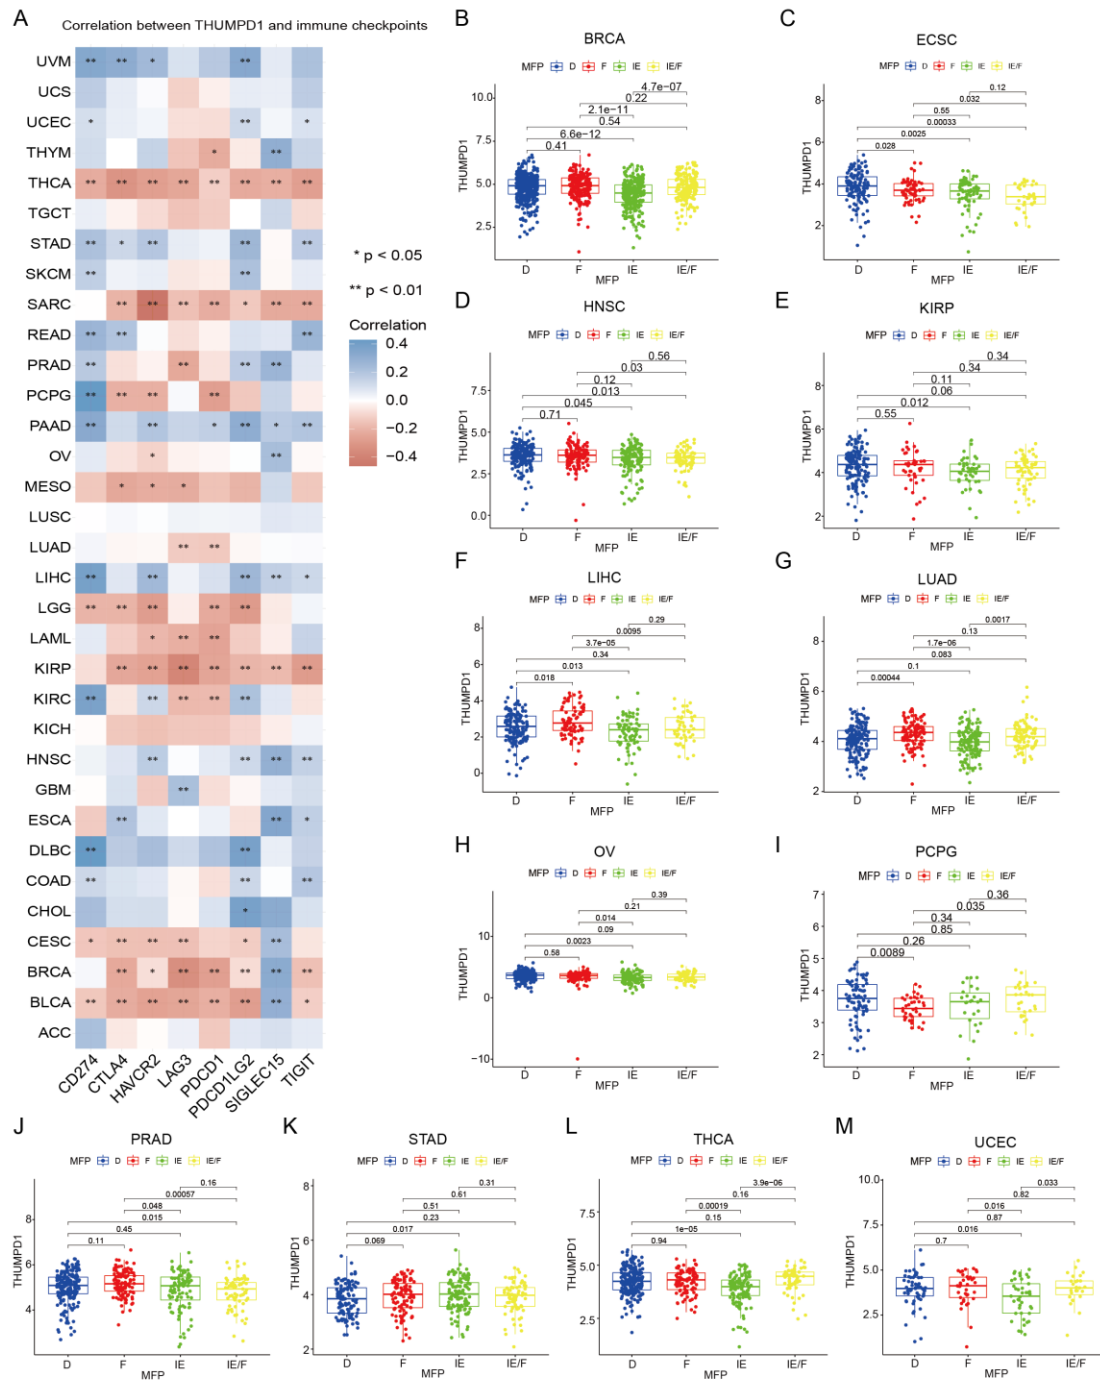

### Supplementary Figure 3. Immunotherapy response prediction.

(A) Heat map describing the correlation between THUMP1 expression and selected immune checkpoint genes. (B-M) Correlation between THUMP1 expression and TME subtypes in BRCA, ECSC, HNSC, KIRP, LIHC, LUAD, OV, PCPG, PRAD, STAD, THCA and UCEC. D: immune-depleted; F: fibrotic; IE: immune-enriched; IE/F: immune-enriched, fibrotic. MFP: molecular function portrait.
